# Supplementary material for: Targeting reactive oxygen species to ameliorate T cell-mediated inflammation in dry eye syndrome: a novel therapeutic approach
Source: Royal Society of Chemistry journal article supplement (doi:10.1039/d4ra06759b), 2024-01-01
Supplement: d4ra06759b1.pdf [file d4ra06759b1.pdf]

## **Targeting Reactive Oxygen Species to Ameliorate T Cell-Mediated Inflammation in Dry Eye Syndrome: A Novel Therapeutic Approach**

Yi Zheng<sup>2#</sup>, Haochen Liu<sup>2#</sup>, Bingkun Lu<sup>2</sup>, Muchen Dong<sup>12\*</sup>, Xinhai Wang<sup>12\*</sup>

*1, Eye Institute of Shandong First Medical University, Eye Hospital of Shandong First Medical University (Shandong Eye Hospital), Jinan 250021, Shandong, China.*

*2, School of Ophthalmology, Shandong First Medical University, Jinan 250000, Shandong, China.*

*#Yi Zheng and Haochen Liu contributed equally to this article.*

*\*Corresponding author:*

**Muchen Dong**, *Eye Institute of Shandong First Medical University, Eye Hospital of Shandong First Medical University (Shandong Eye Hospital); School of Ophthalmology, Shandong First Medical University, 372 Jingsi Road, Jinan 250000, Shandong, China.*

*Email: [dongmuchen0619@163.com](mailto:dongmuchen0619@163.com)*

**Xinhai Wang**, *Eye Institute of Shandong First Medical University, Eye Hospital of Shandong First Medical University (Shandong Eye Hospital); School of Ophthalmology, Shandong First Medical University, 372 Jingsi Road Huaiyin District, Jinan 250000, Shandong, China.*

*Email: [mikeannacs@163.com](mailto:mikeannacs@163.com)*

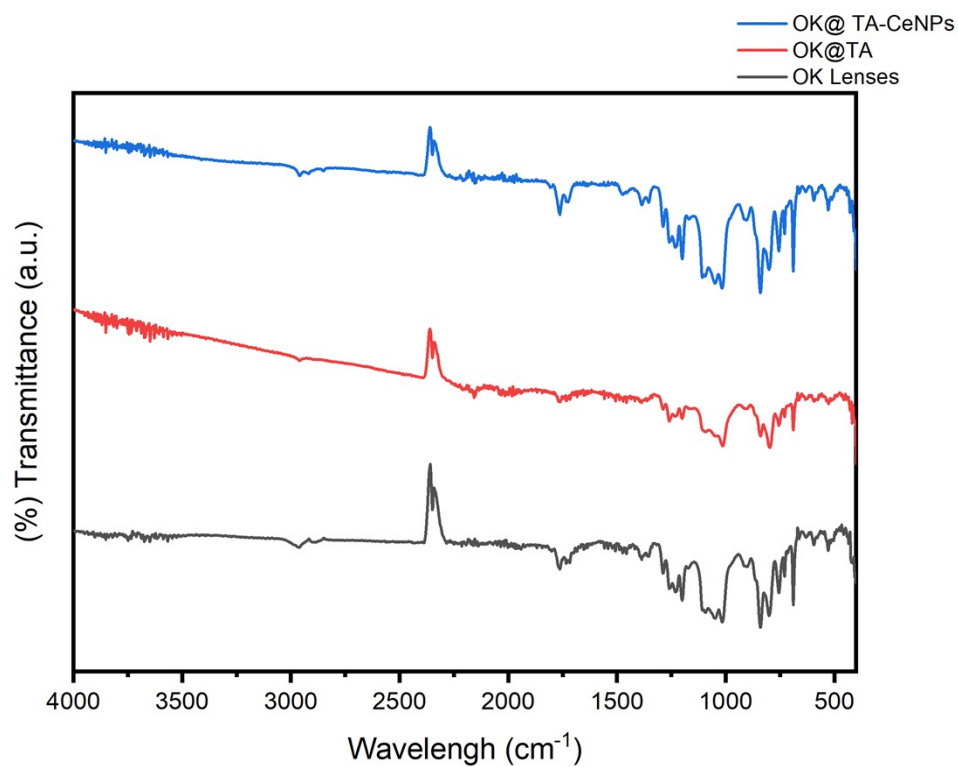

Figure S1. The FTIR analysis of OK, OK@TA, and OK@TA-CeNPs

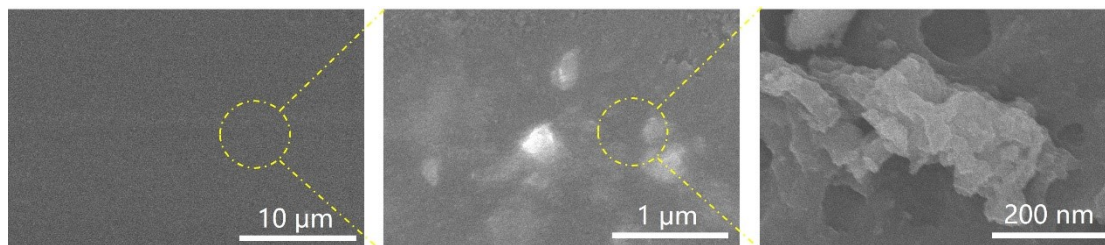

Figure S2. The SEM photo of OK@TA-CeNPs

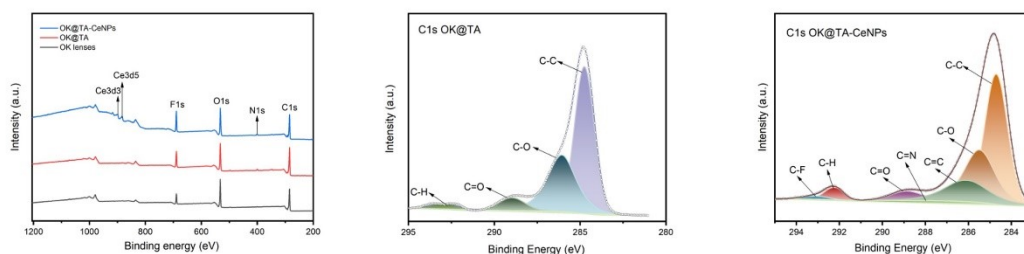

Figure S3. XPS analysis of OK, OK@TA, and OK@TA-CeNPs
